# Supplementary material for: What happens when chitin becomes chitosan? A single-molecule study
Source: Royal Society of Chemistry journal article supplement (doi:10.1039/d2ra07303j), 2023-01-01
Supplement: d2ra07303j1.pdf [file d2ra07303j1.pdf]

## Supporting Information

# **What happens when chitin becomes chitosan? A single-molecule study**

**Lu Qian<sup>2</sup>, Kai Zhang<sup>1</sup>, Xin Guo<sup>1</sup>, Miao Yu<sup>1\*</sup>**

<sup>1</sup> School of Mechanical Engineering, Sichuan University, Chengdu 610065, China;

<sup>2</sup> School of Materials Science and Engineering, South China University of Technology, Guangzhou 510641, China;

\* Correspondence: miaoyu@scu.edu.cn; Tel.: +86-28-85405307

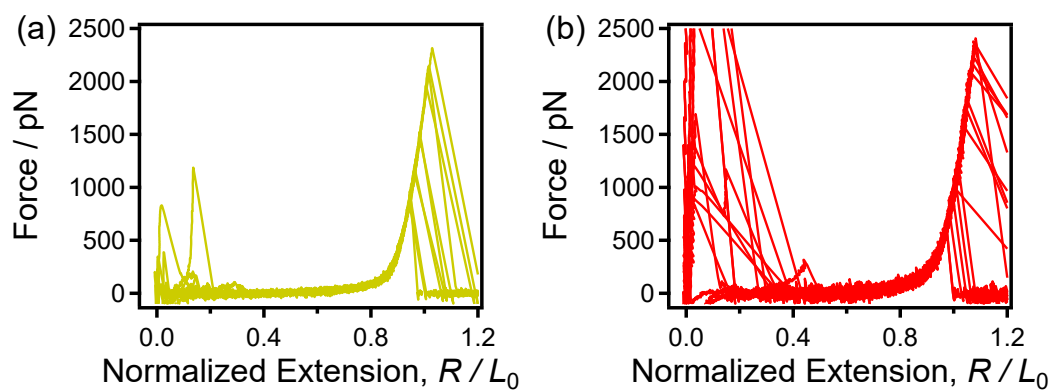

**Fig. S1** The typical F-E curves of chitin (a) and chitosan (b) obtain in nonane respectively.

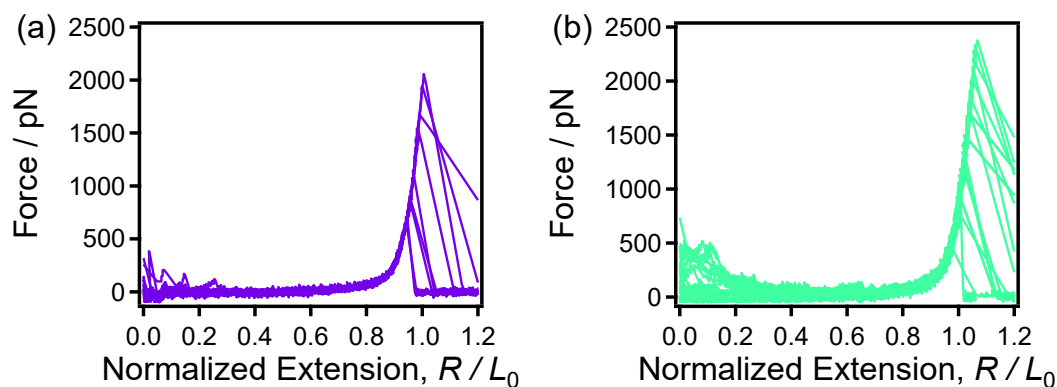

**Fig. S2** The typical F-E curves of chitin (a) and chitosan (b) obtain in DMSO respectively.

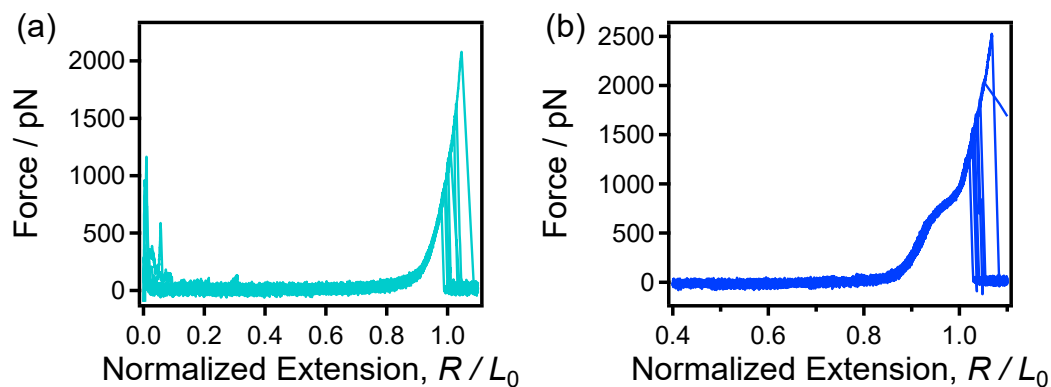

**Fig. S3** The normalized single-chain F-E curves of chitin (a) and chitosan (b) obtained in water respectively.
